# Supplementary material for: Follow-Up of Elevated Blood Lead Levels and Sources in a Cohort of Children in Benin
Source: MDPI journal article supplement (doi:10.3390/ijerph17228689), 2020-11-23
Supplement: s1 [file s1]

**Table S1.** Comparison of characteristics at 1 year between children to assess differences among included and excluded children at 1 year of age.

| Characteristics                                         | Children Assessed at<br>Age 1 Year Only | Children Assessed at<br>Age 1 and 6 Years | <i>P</i> <sup>a</sup> |
|---------------------------------------------------------|-----------------------------------------|-------------------------------------------|-----------------------|
|                                                         | <i>N</i> = 260 <i>n</i> (%)             | <i>N</i> = 425 <i>n</i> (%)               |                       |
| BLLs > 50 µg/L                                          | 163 (62.7)                              | 234 (55.1)                                | 0.05                  |
| BLLs > 100 µg/L                                         | 54 (20.8)                               | 70 (16.5)                                 | 0.2                   |
| Bushmeat consumption                                    | 78 (34.8)                               | 156 (41.2)                                | 0.1                   |
| Child drinks water from the pipe system                 | 191 (85.3)                              | 308 (81.3)                                | 0.2                   |
| Presence of paint in the house                          | 37 (14.3)                               | 59 (14.0)                                 | 0.9                   |
| Presence of paint chips in the house                    | 16 (7.1)                                | 19 (5.0)                                  | 0.3                   |
| Gasoline stored at home                                 | 156 (69.6)                              | 297 (78.4)                                | 0.02                  |
| Maternal use of eye cosmetics                           | 51 (22.8)                               | 62 (16.4)                                 | 0.05                  |
| Paternal high or moderate risk of occupational exposure | 55 (22)                                 | 77 (18.4)                                 | 0.3                   |
| Activity involving potential use of lead                | 16 (7.1)                                | 34 (9.0)                                  | 0.4                   |
| <b>Sociodemographic characteristics</b>                 |                                         |                                           |                       |
| Child's sex (male)                                      | 121 (46.9)                              | 212 (50.1)                                | 0.4                   |
| Wealth score quartiles                                  |                                         |                                           |                       |
| lower                                                   | 89 (35.0)                               | 97 (22.9)                                 | <0.01                 |
| median                                                  | 53 (20.9)                               | 150 (35.5)                                |                       |
| higher                                                  | 50 (19.7)                               | 71 (16.8)                                 |                       |
| highest                                                 | 62 (24.4)                               | 105 (24.8)                                |                       |
| Child lives in collective housing                       | 216 (85.0)                              | 361 (85.3)                                | 0.9                   |
| <b>Health centre location</b>                           |                                         |                                           |                       |
| Sekou                                                   | 145 (56.2)                              | 276 (65.3)                                | 0.02                  |
| Attogon/Allada                                          | 113 (43.8)                              | 147 (34.8)                                |                       |

<sup>a</sup> Pearson chi-square.

**Table S2.** Bivariate analysis between sociodemographic factors and potential sources of lead in children at 6 years (*N* = 425).

| Independent variable                                            | <i>n/N</i> <sup>a</sup> (%) | % Change in BLLs<br>compared with the<br>referent group<br>(95% CI) | Crude OR for 90th<br>percentile of BLLs<br>compared with the<br>referent group (95% CI) |
|-----------------------------------------------------------------|-----------------------------|---------------------------------------------------------------------|-----------------------------------------------------------------------------------------|
| <b>Socio-demographic characteristics</b>                        |                             |                                                                     |                                                                                         |
| Male sex (vs. female)                                           | 212/425 (49.9)              | 11.4 (2.6, 20.9) *                                                  | 2.8 (1.4, 5.6) *                                                                        |
| Some maternal education (vs. none) <sup>†</sup>                 | 155/37.0                    | -4.3 (-12.2, 4.4)                                                   | 0.8 (0.43, 1.64)                                                                        |
| Quartiles of wealth score (vs. lower quintile)                  |                             |                                                                     |                                                                                         |
| lower                                                           | 144/421 (34.2)              |                                                                     |                                                                                         |
| median                                                          | 102/421 (24.2)              | <b>7.8 (-17.4, 2.9)</b>                                             | <b>0.5 (0.20, 1.20)</b>                                                                 |
| high                                                            | 116/421 (27.6)              | 1.1 (-9.0, 12.4)                                                    | 0.8 (0.35, 1.64)                                                                        |
| highest                                                         | 59/421 (14.0)               | <b>12.1 (-22.9, 0.2)</b>                                            | 0.5 (0.16, 1.47)                                                                        |
| Potential sources of lead                                       |                             |                                                                     |                                                                                         |
| Bushmeat consumption (vs. no consumption)                       | 135/325 (41.5)              | 5.8 (-4.2, 16.8)                                                    | 1.5 (0.7, 3.0)                                                                          |
| Currently consuming meat killed by lead bullets (vs. never)     | 88/399 (18.8)               | <b>15.9 (4.2, 28.9)</b>                                             | <b>1.8 (0.9, 3.8)</b>                                                                   |
| Use of pipe system for water source (vs. absence)               | 371/423 (87.7)              | 2.5 (-9.6, 16.3)                                                    | 1.4 (0.5, 4.2)                                                                          |
| Use of bore hole/cement/dug well for water source (vs. absence) | 188/423 (44.4)              | <b>-6.2 (-13.7, 1.9)</b>                                            | 0.8 (0.44, 1.16)                                                                        |
| Consumption of peanuts                                          |                             |                                                                     |                                                                                         |
| <i>never</i>                                                    | 240/418 (57.4)              |                                                                     |                                                                                         |
| <1 / month                                                      | 137/418 (32.8)              | 1.5 (-7.3, 11.2)                                                    | 0.6 (0.3, 1.3)                                                                          |
| >1 / month                                                      | 41/418 (9.8)                | 23.6 (7.1, 42.7) *                                                  | 1.7 (0.7, 4.2)                                                                          |
| Consumption of beans                                            |                             |                                                                     |                                                                                         |
| <1 / month <sup>+</sup>                                         | 61/423 (14.4)               |                                                                     |                                                                                         |
| >1 / month                                                      | 362/423 (85.6)              | 6.9 (-5.0, 20.2)                                                    | 1.7 (0.6, 4.9)                                                                          |
| Consumption of rice                                             |                             |                                                                     |                                                                                         |
| 1-3 times/month or less                                         | 35/423 (8.3)                |                                                                     |                                                                                         |

|                                                                                   |                |                          |                       |
|-----------------------------------------------------------------------------------|----------------|--------------------------|-----------------------|
| <i>1–3 times /week</i>                                                            | 106/423 (25.1) | 6.0 (–10.2, 25.0)        | 0.6 (0.2, 2.7)        |
| <i>4–6 times/week</i>                                                             | 103/423 (24.4) | 88.8 (0.7, 40.3) *       | 1.7 (0.5, 6.2)        |
| <i>At least once/day</i>                                                          | 179/423 (42.3) | <b>14.2 (–2.4, 33.6)</b> | 1.3 (0.4, 4.5)        |
| Consumption of sweet potatoes                                                     |                |                          |                       |
| <i>never</i>                                                                      | 122/423 (28.8) |                          |                       |
| <i>&lt;1 / month</i>                                                              | 204/423 (48.2) | <b>–9.0 (–17.4, 0.3)</b> | 0.5 (0.2, 1.0) *      |
| <i>&gt;1 / month</i>                                                              | 97/423 (22.9)  | 5.1 (–15.5, 6.5)         | 0.8 (0.4, 1.8)        |
| Consumption of Cassava ( <i>Manioc</i> )                                          |                |                          |                       |
| <i>&lt;1 / month</i> ++                                                           | 176/422 (41.7) |                          |                       |
| <i>&gt;1 / month</i>                                                              | 246/422 (58.3) | –0.6 (–8.6, 8.1)         | 1.10 (0.6, 2.3)       |
| Ever ingested soil or other products <sup>b</sup> (vs. no)                        | 174/418 (40.9) | –15.1 (–55.9, 63.6)      | 0.9 (0.4, 1.6)        |
| Child has hand-to-mouth-behavior (vs. no)                                         | 135/421 (32.1) | 3.4 (–5.3, 13.0)         | 1.1 (0.5, 2.1)        |
| House in mud (vs. not in mud)                                                     | 154/422 (36.5) | –0.8 (–9.0, 8.1)         | 1.1 (0.6, 2.1)        |
| Presence of paint in the house                                                    | 56/421 (13.3)  | <b>6.8 (–5.5, 2.7)</b>   | <b>1.9 (0.9, 4.3)</b> |
| Presence of paint chips in the house (vs. absence)                                | 23/421 (5.5)   | 26.2 (4.0, 53.2) *       | 1.4 (0.4, 4.9)        |
| Use of artisanal cookware (made from recycled material)                           | 403/422 (95.5) | 6.9 (–12. 5, 30.6)       | 2.0 (0.3, 15.7)       |
| Use of artisanal cookware (made from terracotta/clay)                             | 59/418 (14.1)  | 4.2 (–7.6, 17.5)         | 0.8 (0.3, 2.2)        |
| Child use eye cosmetics ( <i>Khol</i> ) (vs. no use)                              | 58/413 (14.04) | 0.2 (–11.3, 13.2)        | 1.0 (0.4, 2.6)        |
| Presence of activity with potential use of lead <sup>c</sup> (vs. absence)        | 61/423 (14.4)  | <b>11.6 (0.0, 26.0)</b>  | 2.7 (1.3, 5.6) *      |
| Presence of high or moderate risk of paternal occupational exposure (vs. absence) | 79/424 (18.6)  | 6.5 (–4.2, 18.5)         | 2.8 (1.4, 5.5) *      |
| Residence at 200m of heavy traffic                                                | 327/418 (78.2) | 1.00 (0.5, 2.1)          | 1.00 (0.5, 2.1)       |

<sup>a</sup> Totals may not equal to 260 and 425 due to missing data <sup>b</sup> products include earth, kaolin, kalaba, termite mound <sup>c</sup> activities include metal smelter, battery recycling/storage, radiator repair, metal recycling/storage, lead solder, vehicle repair, manufacturing of ammunition/metal objects \*  $p < 0.05$ , Beta coefficients in bold only have  $p < 0.2$  + includes 9 never consumers, ++ includes 21 never consumers. † defined as completion of primary or higher level.

**Table S3.** Associations between sources of lead and socio-demographic factors.

|                                | Consumption of bushmeat<br><i>n</i> (%) | <i>P</i> | Rice more than 4–6 times per week (vs. less)<br><i>n</i> (%) | <i>P</i> | Peanut more than once per month (vs. less)<br><i>n</i> (%) | <i>P</i> | Presence of paint<br><i>n</i> (%) | <i>P</i> | Presence of occupational exposure<br><i>n</i> (%) | <i>P</i> | Presence of activities with lead<br><i>n</i> (%) | <i>P</i> |
|--------------------------------|-----------------------------------------|----------|--------------------------------------------------------------|----------|------------------------------------------------------------|----------|-----------------------------------|----------|---------------------------------------------------|----------|--------------------------------------------------|----------|
| <b>Sex</b>                     |                                         |          |                                                              |          |                                                            |          |                                   |          |                                                   |          |                                                  |          |
| Boys                           | 38 (19.1)                               | 0.6      | 142 (67.3)                                                   | 0.8      | 20 (9.7)                                                   | 0.9      | 29 (12.8)                         | 0.8      | 42 (19.8)                                         | 0.5      | 31 (14.7)                                        | 0.9      |
| Girls                          | 42 (21.1)                               |          | 140 (66.0)                                                   |          | 21 (10.0)                                                  |          | 27 (13.8)                         |          | 37 (17.5)                                         |          | 30 (14.2)                                        |          |
| <b>Family wealth quartiles</b> |                                         |          |                                                              |          |                                                            |          |                                   |          |                                                   |          |                                                  |          |
| lower                          | 29 (21.5)                               | 0.7      | 97 (67.4)                                                    | 0.4      | 15 (10.6)                                                  | 0.1      | 13 (9.2)                          | 0.01     | 23 (16.1)                                         | 0.6      | 24 (16.7)                                        | 0.4      |
| median                         | 20 (21.1)                               |          | 65 (63.7)                                                    |          | 5 (4.9)                                                    |          | 8 (7.8)                           |          | 20 (19.6)                                         |          | 16 (15.7)                                        |          |
| higher                         | 22 (20.0)                               |          | 84 (72.4)                                                    |          | 17 (14.9)                                                  |          | 21 (18.1)                         |          | 21 (18.1)                                         |          | 11 (9.5)                                         |          |
| highest                        | 8 (13.8)                                |          | 36 (61.0)                                                    |          | 4 (6.9)                                                    |          | 14 (23.7)                         |          | 14 (23.7)                                         |          | 10 (17.0)                                        |          |
| <b>Maternal education</b>      |                                         |          |                                                              |          |                                                            |          |                                   |          |                                                   |          |                                                  |          |
| None                           | 51 (20.7)                               | 0.5      | 176 (66.7)                                                   | 0.9      | 22 (8.33)                                                  | 0.2      | 27 (10.3)                         | 0.02     | 45 (17.1)                                         | 0.4      | 43 (16.3)                                        | 0.2      |
| Some                           | 26 (17.7)                               |          | 103 (66.6)                                                   |          | 19 (12.7)                                                  |          | 29 (18.7)                         |          | 32 (20.7)                                         |          | 18 (11.6)                                        |          |

\* Pearson chi-square test.

**Table S4.** Sensitivity analysis—Multivariable analyses identifying potential sources of lead in 6-year-old children in Benin, 2016–2018, including all children assessed at 6 years (*n* = 478).

| Potential sources                                                           | <i>n</i> (%) | Expected % Difference in BLLs Compared with Referent Group <sup>a</sup> |          | Expected Difference in the Percentiles of BLLs µg/L Compared with the Referent Group (95% CI) <sup>a</sup> |          |                           |          |                   |          |                          |          |
|-----------------------------------------------------------------------------|--------------|-------------------------------------------------------------------------|----------|------------------------------------------------------------------------------------------------------------|----------|---------------------------|----------|-------------------|----------|--------------------------|----------|
|                                                                             |              | % (95% CI)                                                              | <i>p</i> | 25th percentile                                                                                            | <i>p</i> | 50th percentile           | <i>p</i> | 75th percentile   | <i>p</i> | 90th percentile          | <i>p</i> |
| Currently consuming meat killed by lead bullets (vs. no)                    | 85 (19.5)    | <b>10.2 (2.0, 19.1)</b>                                                 | 0.01     | 1.9 (–3.6; 7.4)                                                                                            | 0.5      | 3.1 (–1.6; 7.2)           | 0.2      | 12.2 (–0.4; 18.7) | 0.06     | 11.4 (–14.7; 37.5)       | 0.4      |
| Consumption of rice (referent category: less than 1-3 times/months or less) |              |                                                                         |          |                                                                                                            |          |                           |          |                   |          |                          |          |
| 1-3 times/wk                                                                | 119 (25.3)   | 9.0 (–7.3; 28.2)                                                        | 0.3      | 3.0 (–5.8; 11.8)                                                                                           | 0.5      | 1.9 (–7.4; 11.2)          | 0.7      | 11.5 (–8.6; 31.7) | 0.3      | 4.0 (–38.0; 46.0)        | 0.9      |
| 4-6 times/wk                                                                | 118 (25.1)   | <b>17.1 (–0.5, 37.9)</b>                                                | 0.06     | 1.8 (–7.1; 10.7)                                                                                           | 0.7      | 7.0 (–2.4; 16.4)          | 0.1      | 19.0 (–1.3; 39.4) | 0.07     | 9.9 (–32.4; 52.2)        | 0.7      |
| at least once/day                                                           | 196 (41.7)   | <b>15.1 (–1.4, 34.4)</b>                                                | 0.08     | 3.9 (–4.6; 12.3)                                                                                           | 0.4      | 1.9 (–7.0; 10.8)          | 0.7      | 14.1 (–5.1; 33.4) | 0.2      | 5.5 (–34.6; 45.6)        | 0.8      |
| Consumption of peanuts (referent category: never)                           |              |                                                                         |          |                                                                                                            |          |                           |          |                   |          |                          |          |
| <1 / month                                                                  | 152 (32.8)   | 2.4 (–6.1, 11.7)                                                        | 0.6      | 2.4 (–2.3; 7.2)                                                                                            | 0.3      | –0.5 (–5.5; 4.5)          | 1.0      | 1.5 (–9.4; 12.3)  | 0.8      | 4.1 (–18.4; 26.6)        | 0.7      |
| >1 / month                                                                  | 43 (9.3)     | <b>20.1 (4.3, 38.4)</b>                                                 | 0.01     | <b>6.6 (–1.1; 14.3)</b>                                                                                    | 0.09     | 5.7 (–2.4; 13.8)          | 0.2      | 11.1 (–6.5; 28.7) | 0.2      | <b>46.8 (10.2; 83.4)</b> | 0.01     |
| Consumption of sweet potatoes (referent category: never)                    |              |                                                                         |          |                                                                                                            |          |                           |          |                   |          |                          |          |
| <1 / month                                                                  | 226 (48.1)   | –7.7 (–15.8, 1.3)                                                       | 0.1      | 0.7 (–4.5; 6.0)                                                                                            | 0.8      | <b>–5.9 (–11.2; –0.6)</b> | 0.03     | –6.1 (–17.6; 5.4) | 0.3      | –14.4 (–38.3; 9.5)       | 0.2      |
| >1 / month                                                                  | 107 (22.8)   | –7.7 (17.4, 3.1)                                                        | 0.2      | 0.1 (–6.2; 6.4)                                                                                            | 1.0      | –6.2 (–12.5; 0.1)         | 0.06     | –6.8 (–20.6; 7.0) | 0.3      | –13.0 (–41.7; 15.7)      | 0.4      |

|                                                                                   |            |                         |      |                  |     |                        |      |                   |     |                    |     |
|-----------------------------------------------------------------------------------|------------|-------------------------|------|------------------|-----|------------------------|------|-------------------|-----|--------------------|-----|
| Presence of activity with potential use of lead (vs. absence)                     | 67 (14.3)  | <b>13.3 (1.3, 26.6)</b> | 0.03 | 3.9 (-2.2; 10.0) | 0.2 | <b>6.8 (0.4; 13.2)</b> | 0.04 | 7.4 (-6.4; 21.3)  | 0.3 | -19.4 (-9.5; 48.3) | 0.2 |
| Presence of high or moderate risk of paternal occupational exposure (vs. absence) | 81 (18.4)  | 6.7 (-3.4, 17.9)        | 0.2  | -0.8 (-6.3; 4.6) | 0.8 | -3.3 (-9.0; 2.4)       | 0.3  | 6.2 (-6.2; 18.7)  | 0.3 | 10.2 (-15.6; 36.0) | 0.4 |
| Presence of paint in house (vs. absence)                                          | 63 (13.5)  | 3.6 (-2.7, 9.9)         | 0.3  | 3.6 (-2.7; 9.9)  | 0.3 | 0.9 (-5.8; 7.6)        | 0.8  | 3.4 (-11.1; 17.9) | 0.6 | 16.3 (-13.8; 46.4) | 0.3 |
| Use of bore hole/cement/dug well for water source (vs. absence)                   | 210 (44.7) | -1.4 (-5.8, 2.9)        | 0.5  | -1.1 (-6.0; 3.8) | 0.5 | -1.3 (-5.9; 3.3)       | 0.6  | -3.1 (-13.2; 6.9) | 0.5 | -2.2 (-23.1; 18.7) | 0.8 |

<sup>a</sup> adjusted for sex and family wealth quartiles. The cells with significant differences ( $p < 0.05$ ) are highlighted in light grey. The cells with  $p < 0.2$  are in bold only.
